# Supplementary material for: Enhanced oxidase/peroxidase-like activities of aptamer conjugated MoS2/PtCu nanocomposites and their biosensing application
Source: Royal Society of Chemistry journal article supplement (doi:10.1039/c6ra03507h), 2016-01-01
Supplement: c6ra03507h1.pdf [file c6ra03507h1.pdf]

## Supplementary Information

### Enhanced Oxidase/peroxidase-like Activities of Aptamer Conjugated MoS<sub>2</sub>/PtCu Nanocomposites and Their Biosensing Application

Cui Qi<sup>†</sup>, Shuangfei Cai<sup>†</sup>, Xinhuan Wang, Jingying Li, Zheng Lian, Shanshan Sun, Rong Yang\* and Chen Wang\*

CAS Key Laboratory for Biological Effects of Nanomaterials and Nanosafety  
CAS Center for Excellence in Nanoscience,  
National Center for Nanoscience and Technology  
Beijing, 100190, PR China

E-mail: yangr@nanoctr.cn; wangch@nanoctr.cn

<sup>†</sup> These authors are contributed equally to this work.

#### Materials

Molybdenum (IV) sulfide (MoS<sub>2</sub>, 99%), chloroplatinic acid, copper acetate, 2,2'-azino-bis(3-ethylbenzo-thiazoline-6-sulfonic acid) diammonium salt (ABTS), 3,3',5,5'-tetramethylbenzidine (TMB), *o*-phenylenediamine (OPD) and HRP were purchased from Alfa Aesar. Chitosan was purchased from J&K Chemical Ltd. (Beijing, China). Sodium borohydride (NaBH<sub>4</sub>) and H<sub>2</sub>O<sub>2</sub> were purchased from Sinopharm Chemical Reagent Co., Ltd. (Beijing, China). Streptavidin and DNA were purchased from Sangon biotechnology Co., Ltd. (Shanghai, China). All the chemicals were of analytical grade and used as received without further purification. Milli-Q water (18 MΩ·cm) was used for all solution preparation.

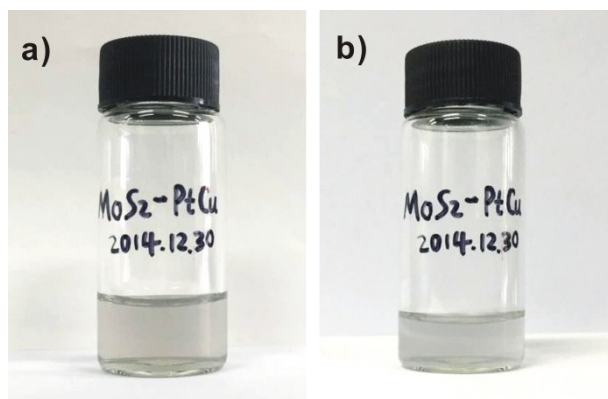

**Fig. S1** The freshly prepared sample solution of MoS<sub>2</sub>/PtCu nanocomposites (a) and sample solution stored for over a year (b).

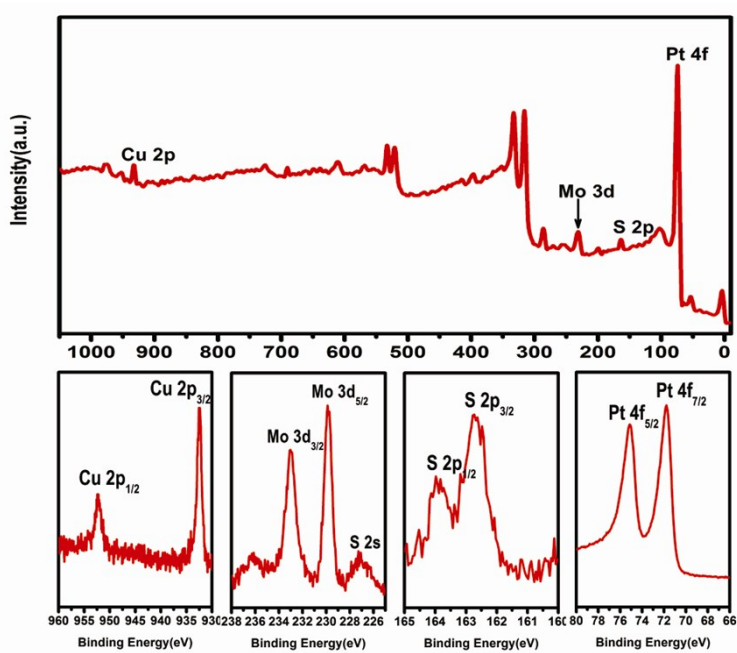

**Fig. S2** XPS spectra of as-prepared MoS<sub>2</sub>/PtCu nanocomposites.

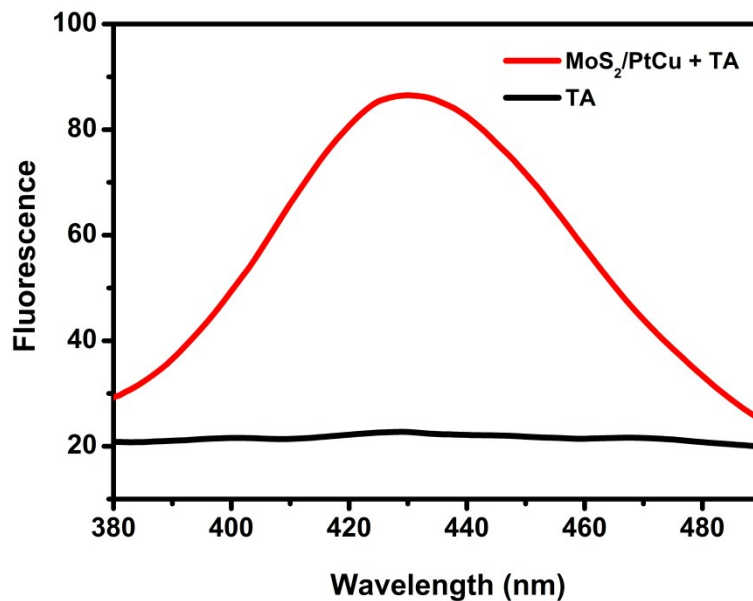

**Fig. S3** The fluorescence spectra of TA (black line) and MoS<sub>2</sub>/PtCu nanocomposites +TA (red line).  $E_x=315$  nm.

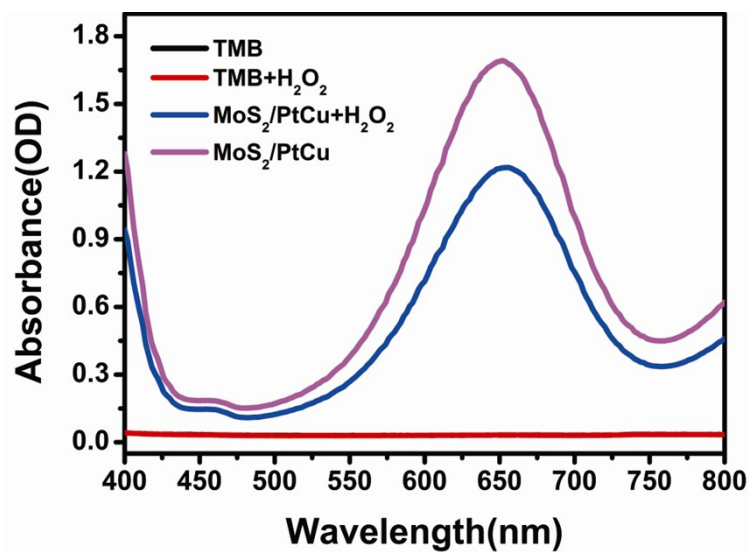

**Fig. S4** The oxidase- and peroxidase-like activities of as-prepared MoS<sub>2</sub>/PtCu nanocomposites.

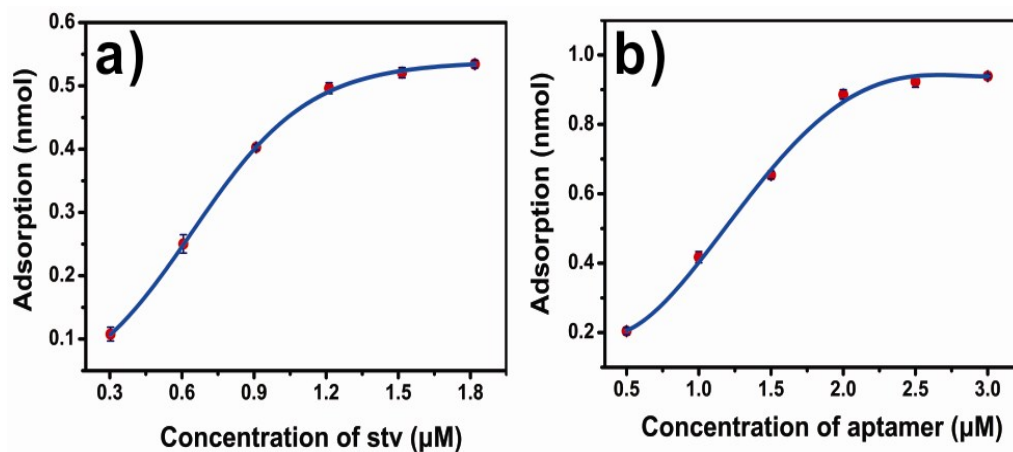

**Fig. S5** The evaluation of adsorption of streptavidin (a) and aptamer S2.2 (b) on  $\text{MoS}_2/\text{PtCu}$  nanocomposites.

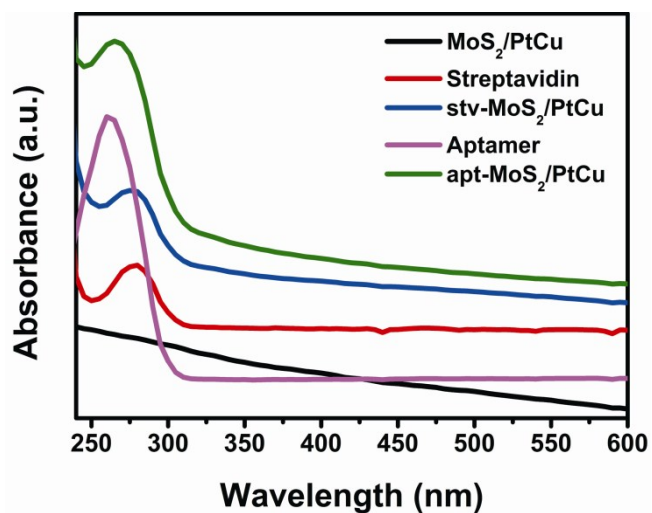

**Fig. S6** UV-Vis spectra of  $\text{MoS}_2/\text{PtCu}$ , streptavidin, stv- $\text{MoS}_2/\text{PtCu}$ , aptamer and apt- $\text{MoS}_2/\text{PtCu}$ .

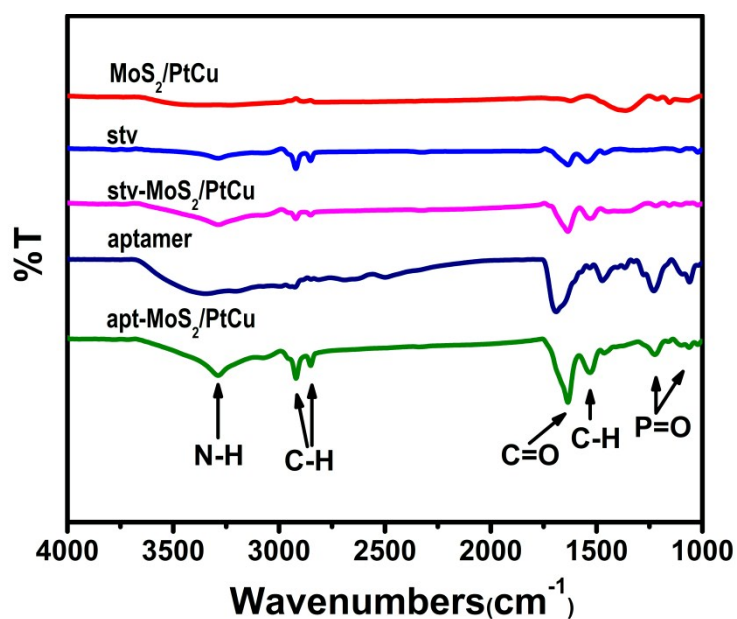

**Fig. S7** FT-IR spectra of MoS<sub>2</sub>/PtCu, streptavidin, stv-MoS<sub>2</sub>/PtCu, aptamer and apt-MoS<sub>2</sub>/PtCu.

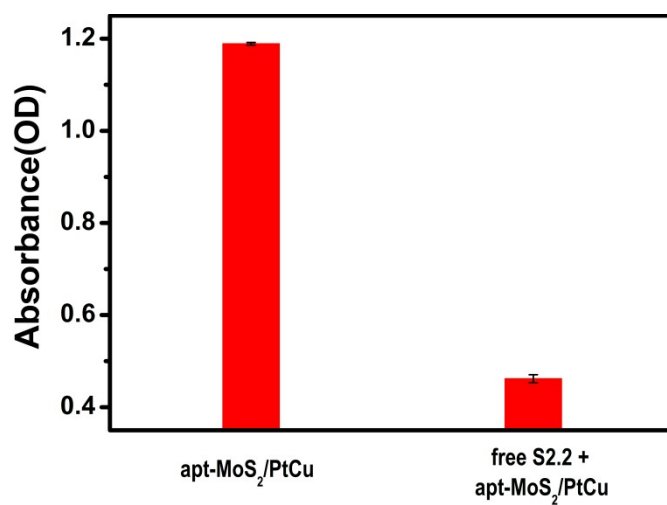

**Fig. S8** Binding abilities of apt-MoS<sub>2</sub>/PtCu to MCF-7 cells with and without free S2.2 aptamers.

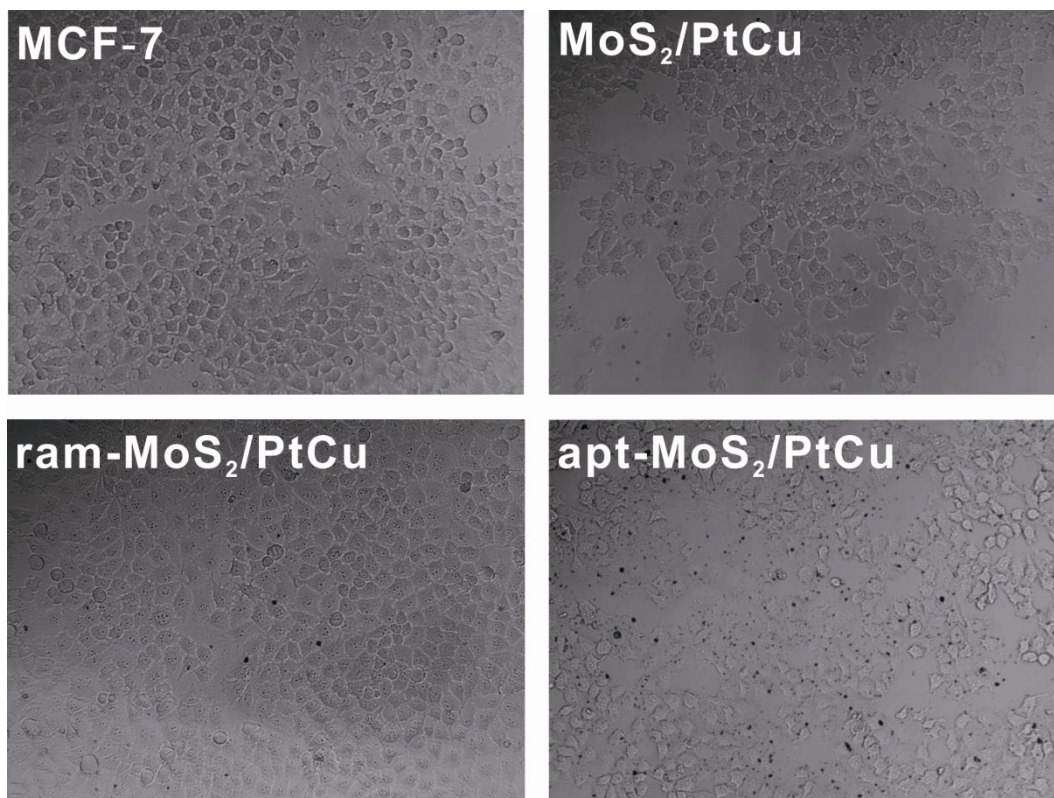

**Fig. S9** Optical microscopic images of MCF-7 cells alone and MCF-7 cells after incubation with MoS<sub>2</sub>/PtCu, ram-MoS<sub>2</sub>/PtCu and apt-MoS<sub>2</sub>/PtCu.

**Table S1.** Apparent kinetic parameters<sup>a</sup> of MoS<sub>2</sub>/PtCu nanocomposite as peroxidase mimic and HRP.  $K_m$  is the Michaelis constant and  $V_{max}$  is the maximal reaction velocity.

| Enzyme                 | Substrate                     | $K_m$<br>(mM) | $V_{max}$<br>(mol L <sup>-1</sup> / s) |
|------------------------|-------------------------------|---------------|----------------------------------------|
| MoS <sub>2</sub> /PtCu | H <sub>2</sub> O <sub>2</sub> | 0.801         | 14.7 X 10 <sup>-8</sup>                |
| MoS <sub>2</sub> /PtCu | TMB                           | 0.220         | 9.25 X 10 <sup>-8</sup>                |
| HRP                    | H <sub>2</sub> O <sub>2</sub> | 0.678         | 10.8 X 10 <sup>-8</sup>                |
| HRP                    | TMB                           | 0.545         | 23.5 X 10 <sup>-8</sup>                |

<sup>a</sup>Conditions: at 30°C in a pH 3.5 PB (0.02M) buffer.

**Table S2.** Zeta potential of the as-prepared MoS<sub>2</sub>/PtCu, stv-MoS<sub>2</sub>/PtCu and apt-MoS<sub>2</sub>/PtCu in water at 25 °C.

| <b>Composition</b>         | <b>Zeta potential (mV)</b> |
|----------------------------|----------------------------|
| MoS <sub>2</sub> /PtCu     | - 29.7 ± 1.3               |
| stv-MoS <sub>2</sub> /PtCu | 31.9 ± 1.0                 |
| apt-MoS <sub>2</sub> /PtCu | - 35.7 ± 0.8               |
